# Supplementary figures and images for: Bi-directional drones to strengthen healthcare provision: experiences and lessons from Madagascar, Malawi and Senegal
Source: PubMed Central journal article supplement — BMJ Glob Health. 2019 Jul 30;4(4):e001541. doi: 10.1136/bmjgh-2019-001541 (PMC6673761; doi:10.1136/bmjgh-2019-001541), 2019-07-30

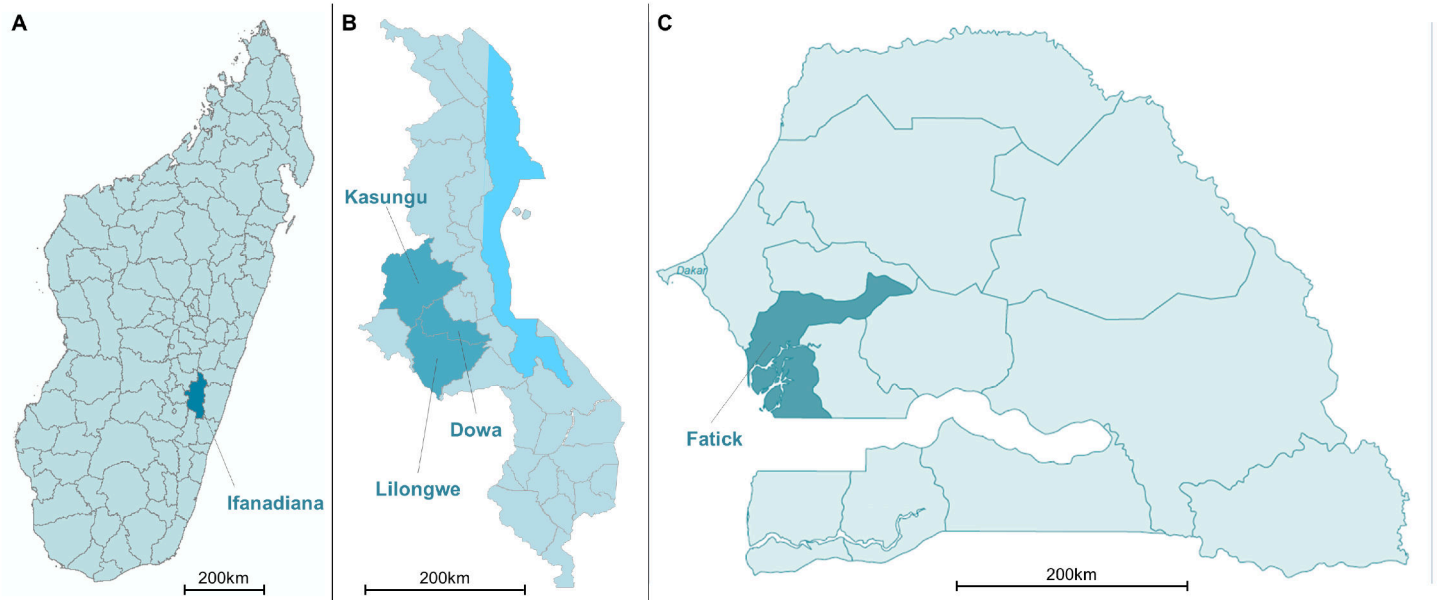

Supplement: bmjgh-2019-001541supp001.pdf [file bmjgh-2019-001541supp001.pdf]
